# Supplementary material for: Planococcus maritimus ML1206 Isolated from Wild Oysters Enhances the Survival of Caenorhabditis elegans against Vibrio anguillarum
Source: MDPI journal article supplement (doi:10.3390/md19030150), 2021-03-12
Supplement: s1 [file s1]

# Planococcus maritimus ML1206 Isolated from Wild Oysters Enhances the Survival of Caenorhabditis elegans against Vibrio anguillarum

Ying-Xiu Li <sup>1</sup>, Nan-Nan Wang <sup>1</sup>, Yan-Xia Zhou <sup>1</sup>, Chun-Guo Lin <sup>1</sup>, Jing-Shan Wu <sup>1</sup>, Xin-Qi Chen <sup>1</sup>, Guan-Jun Chen <sup>1,2,\*</sup> and Zong-Jun Du <sup>1,2,\*</sup>

<sup>1</sup> Marine College, Shandong University, Weihai 264209, China; yingxiuli@sdu.edu.cn (Y.L.); wangnan2016@mail.sdu.edu.cn (N.W.); zhouyx@sdu.edu.cn (Y.Z.); linchunguo@mail.sdu.edu.cn (C.L.); wujingshan@mail.sdu.edu.cn (J.W.); chenxinqi@mail.sdu.edu.cn (X.C.)  
<sup>2</sup> State Key Laboratory of Microbial Technology, Shandong University, Jinan 250100, China  
\* Correspondence: [guanjun@sdu.edu.cn](mailto:guanjun@sdu.edu.cn) (G.C.); [duzongjun@sdu.edu.cn](mailto:duzongjun@sdu.edu.cn) (Z.D.)

## Method

### 1. C. elegans Length Determination

Ten synchronized *C. elegans* N2 in L1 stage were transferred to NGM medium coated with OP50 and ML1206, respectively. *C. elegans* were cultured at 20 °C to the 2-days adult stage. *C. elegans* were picked to slides covered with agarose, anesthetized with levamisole hydrochloride, and placed under a stereomicroscope to measure body length with a micrometer. The head (oral position) of the *C. elegans* was taken as the starting point, and following the middle part of the body to the tail part of the *C. elegans* was taken as the measurement endpoint. NIS elements software was used to calculate the body of the *C. elegans* body <sup>[1]</sup>. The test was performed three times.

### 2. C. elegans Motility Determination

Referring to the methods of Tsalik and Hobert <sup>[2]</sup>, the effect of ML1206 on *C. elegans* motility was tested. Ten synchronized *C. elegans* N2 in L1 stage were transferred to NGM medium coated with OP50 and ML1206, respectively. *C. elegans* were cultured at 20 °C to the 2-days adult stage. Then the *C. elegans* were transferred to new NGM plates. After the free movement of *C. elegans* in the first minute, the bending times of the *C. elegans* within 30 s were observed and recorded under a stereoscopic microscope as the indicator of bending frequency. One bending of the body is defined as a change in the movement of the body along the corresponding X-axis during *C. elegans* crawling, assuming that the direction along the pharyngeal pump is the Y-axis <sup>[3]</sup>. The test was performed three times.

### 3. C. elegans Pharyngeal Pumping Experiment

Ten synchronized *C. elegans* N2 in L1 stage were transferred to NGM medium coated with OP50 and ML1206, respectively. *C. elegans* were cultured at 20 °C to the 2-days adult stage. Then the *C. elegans* were transferred to new NGM plates, the pump activity of *C. elegans* pharyngeal terminal bulb was observed through stereomicroscope (×400), and the number of pharyngeal pump activities within 1 min was recorded, the swallowing rate of *C. elegans* <sup>[1]</sup>. The test was performed three times.

### 4. C. elegans Reproductive Capacity Determination

Ten synchronized L1 N2 were selected to NGM medium coated with OP50 and ML1206, respectively. One plate was for one worm and kept *C. elegans* lay eggs at 20 °C. The parent *C. elegans* were transferred to a new NGM medium coated with OP50 and ML1206 every 12 h, and the number of eggs in each old culture dish was recorded until the *C. elegans* stopped laying eggs. The sum of eggs in plates of each group was the total number of eggs laid by 10 *C. elegans*, and the averages of offspring produced by each *C. elegans* were calculated to characterize the reproductive capacity of the parent *C. elegans* <sup>[1]</sup>. The test was performed three times.

## Results

Table S1. Stains from the intestine of oyster and perch

| number | Stain number | Putative identity                           |
|--------|--------------|---------------------------------------------|
| 1      | M0101        | <i>Pseudoalteromonas haloplanktis</i> 98.2% |

|    |        |                                                 |
|----|--------|-------------------------------------------------|
| 2  | M0102  | <i>Marinobacter hydrocarbonoclasticus</i> 98.8% |
| 3  | M0103  | <i>Psychrobacter celer</i> 98.8%                |
| 4  | M0104  | <i>Pseudoalteromonas nigrifaciens</i> 98.1%     |
| 5  | M0106  | <i>Lacinutrix undariae</i> 98.0%                |
| 6  | M0107  | <i>Pseudoalteromonas translucida</i> 98.2%      |
| 7  | M1201  | <i>Bacillus siamensis</i> 98.0%                 |
| 8  | ML1202 | <i>Bacillus tequilensis</i> 98.9%               |
| 9  | ML1206 | <i>Planococcus maritimus</i> 99.2%              |
| 10 | ML1209 | <i>Pseudoalteromonas fuliginea</i> 99.2%        |
| 11 | ML1210 | <i>Sulfitobacter pontiacus</i> 98.3%            |
| 12 | ML1211 | <i>Olleya algicola</i> 99.9%                    |
| 13 | ML1212 | <i>Bacillus flexus</i> 98.8%                    |
| 14 | ML1216 | <i>Bacillus firmus</i> 97.5%                    |
| 15 | ML1224 | <i>Pseudoalteromonas neustonica</i> 97.3%       |
| 16 | ML1226 | <i>Pseudovibrio japonicus</i> 99.0%             |
| 17 | ML1227 | <i>Bacillus altitudinis</i> 98.4%               |
| 18 | ML1229 | <i>Ruegeria atlantica</i> 99.3%                 |
| 19 | YLY02  | <i>Vibrio alfacensis</i> 99.5%                  |
| 20 | YLY03  | <i>Sunxiuqinia elliptica</i> 99.1%              |
| 21 | YLY04  | <i>Maribius pontilimi</i> 95.33%                |
| 22 | YLY05  | <i>Idiomarina sediminum</i> 98.9%               |
| 23 | YLY06  | <i>Vibrio orientalis</i> 100%                   |
| 24 | YLY07  | <i>Brumimicrobium mesophilum</i> 95.2%          |
| 25 | YLY08  | <i>Oceaniglobus indicus</i> 93.4%               |
| 26 | YLY09  | <i>Nitratireductor aquimarinus</i> 98.1%        |
| 27 | YLY10  | <i>Microbacterium esteraromaticum</i> 98.1%     |
| 28 | YLY13  | <i>Bacillus halosaccharovorans</i> 98.8%        |
| 29 | YLY14  | <i>Roseovarius pacificus</i> 99.6%              |
| 30 | YLY17  | <i>Shewanella indica</i> 98.6%                  |
| 31 | YLY18  | <i>Vibrio atypicus</i> 99.9%                    |
| 32 | YLY20  | <i>Ornithinimicrobium kibberense</i> 95.7%      |
| 33 | YLY21  | <i>Litoreibacter arenae</i> 99.8%               |
| 34 | YLY22  | <i>Halobacillus alkaliphilus</i> 97.8%          |
| 35 | YLY23  | <i>Jeotgalibacillus campisalis</i> 99.0%        |
| 36 | YLY25  | <i>Marinobacter pelagius</i> 98.9%              |
| 37 | YLY26  | <i>Stappia stellulata</i> 99.1%                 |
| 38 | YLY27  | <i>Idiomarina aestuarii</i> 99.4%               |
| 39 | YLY28  | <i>Roseovarius halotolerans</i> 98.9%           |
| 40 | YLY29  | <i>Shimia biformata</i> 97.8%                   |
| 41 | YLY32  | <i>Halomonas aestuarii</i> 96.8%                |

---

Table S2. Hemolysis of strains

| Strain number | Hemolysis | Strain number | Hemolysis |
|---------------|-----------|---------------|-----------|
| M0101         | +         | YLY06         | -         |
| M0102         | -         | YLY07         | -         |
| M0103         | +         | YLY08         | -         |
| M0104         | +         | YLY09         | -         |
| M0106         | +         | YLY10         | -         |
| M0107         | +         | YLY13         | +         |
| ML1201        | +         | YLY14         | +         |
| ML1202        | +         | YLY17         | +         |
| ML1206        | -         | YLY18         | +         |
| ML1209        | +         | YLY20         | -         |
| ML1210        | -         | YLY21         | -         |
| ML1211        | +         | YLY22         | +         |
| ML1212        | +         | YLY23         | +         |
| ML1216        | +         | YLY25         | -         |
| ML1224        | +         | YLY26         | -         |
| ML1226        | +         | YLY27         | -         |
| ML1227        | +         | YLY28         | -         |
| ML1229        | -         | YLY29         | +         |
| YLY02         | -         | YLY32         | -         |
| YLY03         | -         | SDUM002245    | +         |
| YLY04         | -         | LGG           | -         |
| YLY05         | -         |               |           |

Note: "+" means positive; "-" stands means negative

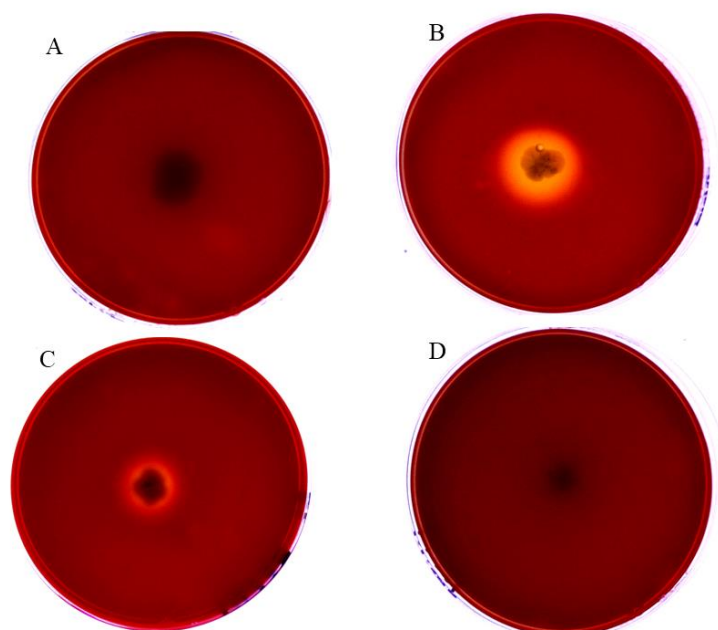

Figure S1. Hemolysis of some strains on 5% sheep blood agar (partial)

Note: A, strain ML1206; B, strain YLY14; C, control (*V. anguillarum*); D, negative control (strain LGG)

Table S3 Low pH tolerance ability of twenty intestinal bacteria (Mean±SD)

| Strain number | OD <sub>600</sub> value |       | Acid-resistant survival rate (%) |
|---------------|-------------------------|-------|----------------------------------|
|               | pH 7.4 (pH5.6 for LGG)  | pH3.0 |                                  |

|        |                             |                           |                          |
|--------|-----------------------------|---------------------------|--------------------------|
| M0102  | 0.49±0.03 <sup>cd,A</sup>   | 0.05±0.05 <sup>gh,B</sup> | 10.30±0.02 <sup>gf</sup> |
| ML1206 | 0.47±0.03 <sup>cde,A</sup>  | 0.37±0.02 <sup>c,A</sup>  | 79.51±0.03 <sup>b</sup>  |
| ML1210 | 0.41±0.02 <sup>defg,A</sup> | 0.07±0.05 <sup>gh,A</sup> | 16.33±0.02 <sup>gf</sup> |
| ML1229 | 0.68±0.02 <sup>b,A</sup>    | 0.08±0.01 <sup>gh,A</sup> | 11.80±0.02 <sup>gf</sup> |
| YLY02  | 0.44±0.04 <sup>deg,A</sup>  | 0.06±0.00 <sup>gh,A</sup> | 13.73±0.01 <sup>gf</sup> |
| YLY03  | 0.81±0.02 <sup>a,A</sup>    | 0.09±0.02 <sup>g,A</sup>  | 11.12±0.02 <sup>gf</sup> |
| YLY04  | 0.38±0.03 <sup>fg,A</sup>   | 0.07±0.01 <sup>gh,A</sup> | 18.45±0.04 <sup>gf</sup> |
| YLY05  | 0.45±0.02 <sup>de,A</sup>   | 0.28±0.03 <sup>e,A</sup>  | 61.14±0.05 <sup>e</sup>  |
| YLY06  | 0.68±0.01 <sup>b,A</sup>    | 0.13±0.01 <sup>f,A</sup>  | 18.69±0.02 <sup>gf</sup> |
| YLY07  | 0.39±0.06 <sup>efg,A</sup>  | 0.06±0.01 <sup>gh,B</sup> | 16.67±0.03 <sup>gf</sup> |
| YLY08  | 0.20±0.01 <sup>j,A</sup>    | 0.05±0.01 <sup>i,A</sup>  | 23.89±0.04 <sup>f</sup>  |
| YLY09  | 0.38±0.03 <sup>gh,A</sup>   | 0.21±0.03 <sup>e,A</sup>  | 54.62±0.04 <sup>d</sup>  |
| YLY10  | 0.32±0.02 <sup>hi</sup>     | 0.17±0.01 <sup>e</sup>    | 53.77±0.05 <sup>d</sup>  |
| YLY20  | 0.43±0.02 <sup>defg</sup>   | 0.07±0.01 <sup>gh</sup>   | 16.91±0.01 <sup>gf</sup> |
| YLY21  | 0.45±0.01 <sup>def</sup>    | 0.05±0.01 <sup>gh</sup>   | 11.77±0.01 <sup>gf</sup> |
| YLY25  | 0.31±0.03 <sup>i,A</sup>    | 0.26±0.02 <sup>d,A</sup>  | 85.24±0.04 <sup>b</sup>  |
| YLY26  | 0.29±0.01 <sup>i,A</sup>    | 0.07±0.01 <sup>gh,A</sup> | 25.02±0.02 <sup>f</sup>  |
| YLY27  | 0.30±0.02 <sup>i,A</sup>    | 0.07±0.00 <sup>gh,B</sup> | 23.74±0.02 <sup>f</sup>  |
| YLY28  | 0.44±0.02 <sup>de,A</sup>   | 0.06±0.00 <sup>gh,B</sup> | 13.57±0.01 <sup>gf</sup> |
| YLY32  | 0.76±0.06 <sup>a,A</sup>    | 0.49±0.04 <sup>b,A</sup>  | 65.56±0.10 <sup>c</sup>  |
| LGG    | 0.52±0.03 <sup>c,A</sup>    | 0.62±0.02 <sup>a,A</sup>  | 118.71±0.02 <sup>a</sup> |

Note: different lowercase letters on superscript represent significant differences between different strains ( $p < 0.05$ ); Different capital letters represent significant differences under different pH ( $p < 0.05$ ).

Table S4. Bile salt tolerance ability of twenty intestinal bacteria (Mean±SD)

| Strain number | D <sub>600</sub> value       |                            | Bile salt tolerance survival rate (%) |
|---------------|------------------------------|----------------------------|---------------------------------------|
|               | Bile salt 0.0%               | Bile salt 0.3%             |                                       |
| M0102         | 0.41±0.08 <sup>ghij,A</sup>  | 0.07±0.01 <sup>ghi,B</sup> | 17.75±0.03 <sup>efg</sup>             |
| ML1206        | 0.70±0.02 <sup>c,A</sup>     | 0.57±0.03 <sup>a,A</sup>   | 81.84±0.04 <sup>ab</sup>              |
| ML1210        | 0.46±0.04 <sup>fgh,A</sup>   | 0.07±0.01 <sup>ghi,B</sup> | 15.96±0.01 <sup>efgh</sup>            |
| ML1229        | 0.46±0.02 <sup>fgh,A</sup>   | 0.06±0.01 <sup>hi,B</sup>  | 12.46±0.01 <sup>fgh</sup>             |
| YLY02         | 0.34±0.02 <sup>ijkl,A</sup>  | 0.20±0.02 <sup>e,A</sup>   | 57.06±0.06 <sup>c</sup>               |
| YLY03         | 0.42±0.02 <sup>ghi,A</sup>   | 0.10±0.01 <sup>g,A</sup>   | 24.91±0.03 <sup>e</sup>               |
| YLY04         | 0.57±0.02 <sup>de,B</sup>    | 0.05±0.01 <sup>hi,B</sup>  | 9.29±0.01 <sup>h</sup>                |
| YLY05         | 0.51±0.01 <sup>ef,A</sup>    | 0.38±0.03 <sup>b,A</sup>   | 74.45±0.04 <sup>b</sup>               |
| YLY06         | 0.70±0.02 <sup>c,A</sup>     | 0.56±0.03 <sup>a,A</sup>   | 79.60±0.03 <sup>ab</sup>              |
| YLY07         | 0.32±0.02 <sup>l,B</sup>     | 0.04±0.01 <sup>hi,B</sup>  | 13.46±0.02 <sup>fgh</sup>             |
| YLY08         | 0.32±0.02 <sup>l,B</sup>     | 0.04±0.00 <sup>hi,B</sup>  | 12.56±0.01 <sup>fgh</sup>             |
| YLY09         | 0.43±0.02 <sup>gh,A</sup>    | 0.27±0.03 <sup>c,A</sup>   | 63.90±0.07 <sup>c</sup>               |
| YLY10         | 0.33±0.04 <sup>kl,A</sup>    | 0.04±0.01 <sup>i,B</sup>   | 11.32±0.03 <sup>fgh</sup>             |
| YLY20         | 0.39±0.03 <sup>hijkl,A</sup> | 0.05±0.01 <sup>hi,B</sup>  | 13.01±0.03 <sup>fgh</sup>             |
| YLY21         | 0.40±0.02 <sup>ghijk,A</sup> | 0.08±0.01 <sup>gh,B</sup>  | 20.16±0.03 <sup>ef</sup>              |
| YLY25         | 0.45±0.05 <sup>fgh,A</sup>   | 0.15±0.02 <sup>f,A</sup>   | 35.12±0.07 <sup>d</sup>               |
| YLY26         | 0.80±0.01 <sup>b,A</sup>     | 0.06±0.00 <sup>hi,B</sup>  | 7.50±0.01 <sup>h</sup>                |
| YLY27         | 0.60±0.01 <sup>d,A</sup>     | 0.04±0.00 <sup>hi,B</sup>  | 6.67±0.00 <sup>h</sup>                |
| YLY28         | 0.47±0.03 <sup>fg,A</sup>    | 0.05±0.01 <sup>hi,B</sup>  | 11.45±0.01 <sup>fgh</sup>             |
| YLY32         | 0.97±0.03 <sup>a,A</sup>     | 0.23±0.04 <sup>d,A</sup>   | 24.10±0.04 <sup>e</sup>               |
| LGG           | 0.35±0.02 <sup>ijkl,A</sup>  | 0.30±0.02 <sup>c,A</sup>   | 87.42±0.05 <sup>a</sup>               |

Note: different lowercase letters on superscript represent significant differences between different strains ( $p < 0.05$ );

Different capital letters represent significant differences under different bile salt concentration values ( $p < 0.05$ ).

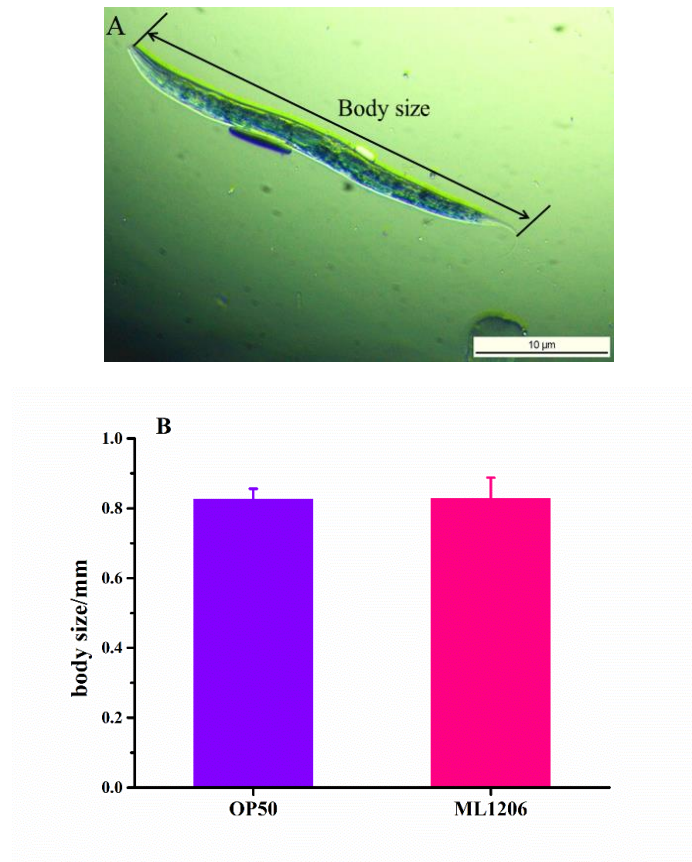

Figure S2. Effect of ML1206 strain on *C. elegans* growth: (a) Schematic diagram of *C. elegans* body length calculated with NIS elements software (b) Worms were grown in the presence of OP50 or ML1206 to the 2-day adult stage *C. elegans*. After anesthesia with levamisole hydrochloride, their body length was measured under a stereoscopic microscope ( $\times 400$ ) with a micrometer. Data are representative of three independent experiments and presented as means  $\pm$  SD.

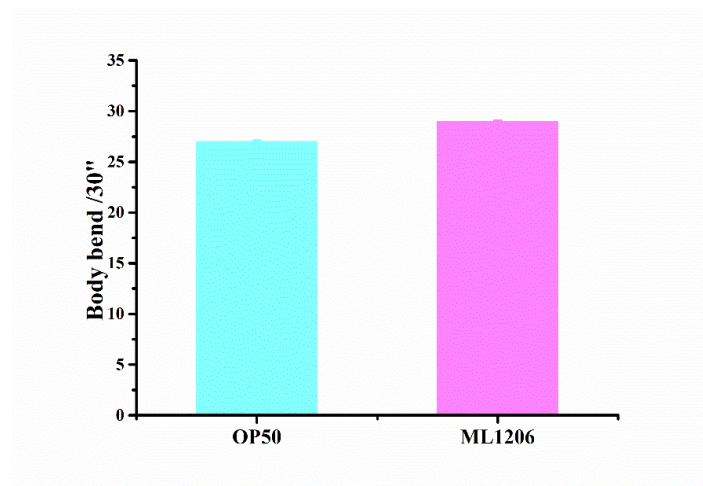

Figure S3. Effect of ML1206 strain on *C. elegans* body bending frequency: Worms were grown in the presence of OP50 or ML1206 to the 2-day adult stage *C. elegans*, and the body bending times of *C. elegans* within 30 S were recorded under a stereoscopic microscope ( $\times 400$ ). Data are representative of three independent experiments and presented as means  $\pm$  SD.

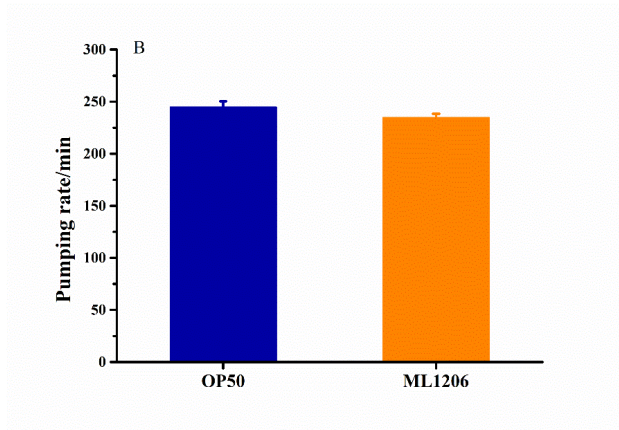

Figure S4. Effect of ML1206 strain on *C. elegans* pharyngeal pumping rate: Worms were grown in the presence of OP50 or ML1206 to the 2-day adult stage *C. elegans*. The worm was recorded within 1 min. Data are representative of three independent experiments and presented as means  $\pm$  SD.

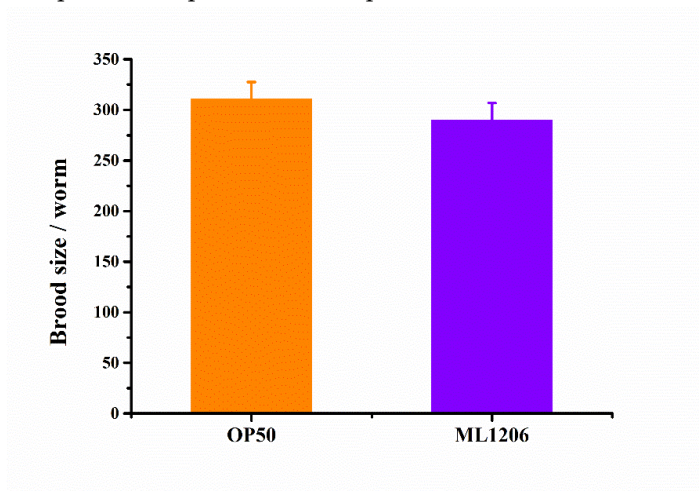

Figure S5. Effect of ML1206 strain on *C. elegans* reproduction ability: Average egg production per worm fed with OP50 or ML1206. Data are representative of three independent experiments and presented as means  $\pm$  SD.

- [1] Zanni E.; Laudenzi C.; Schifano E.; Palleschi C.; Perozzi G.; Uccelletti D.; Devirgiliis C. Impact of a Complex Food Microbiota on Energy Metabolism in the Model Organism *Caenorhabditis elegans*. *Biomed Res Int.* **2015**, 2015, 621709.
- [2] Tsalik E.L.; Hobert O. Functional mapping of neurons that control locomotory behavior in *Caenorhabditis elegans*. *Journal of neurobiology.* **2003**, 56, 178-197.
- [3] Wu C.; Wang H.; Zhang X.W.; Qin X.W.; Zhou X.H.; et al. L-arabinose promotes the growth and development of *Caenorhabditis elegans* and reduces fat synthesis. *Mod Food Sci Technol.* **2018**, 34, 1–6.
